# Supplementary material for: Synthesis and characterisation of [(triphos)Fe(CO)H2] and its protonation to a dihydrogen complex via an unconventional hydrogen-bonded intermediate
Source: Royal Society of Chemistry journal article supplement (doi:10.1039/b801652f), 2008-01-01
Supplement: b801652f.pdf [file b801652f.pdf]

**Supplementary Material for Synthesis, Characterisation and Protonation  
Studies of [(triphos)Fe(CO)H<sub>2</sub>]**

Gemma Guilera,<sup>a</sup> G. Sean McGrady,<sup>b\*</sup> Jonathan W. Steed,<sup>c\*</sup> Richard P. L. Burchell,<sup>b</sup> Peter  
Sirsch,<sup>b</sup> and Anthony J. Deeming<sup>d</sup>

<sup>a</sup> *Experiments Division, CELLS-ALBA, Ed. C3, Campus UAB, Bellaterra, Spain*

<sup>b</sup> *Department of Chemistry, University of New Brunswick, 30 Dineen Drive, Fredericton,  
N.B. E3B 6E2, Canada.*

<sup>c</sup> *Department of Chemistry, University of Durham, South Road, Durham, DH1 3LE, U.K.*

<sup>d</sup> *Department of Chemistry, University College London, 20 Gordon Street, London WC1H  
0AJ, U.K.*

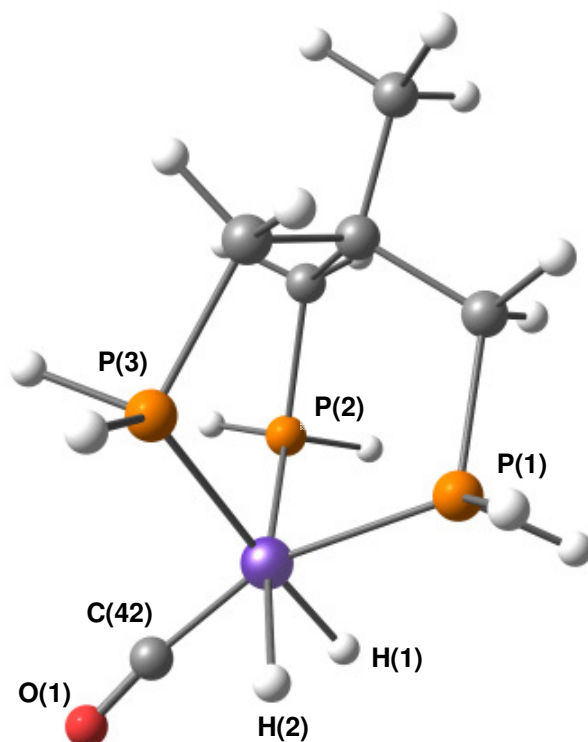

**Figure S1.** DFT structure of [(triphos')Fe(CO)H<sub>2</sub>] (**1'**) calculated at the B3LYP level of theory with a 6-31G(d,p) basis set. Selected bond lengths (in Å): Fe–H(1) 1.52, Fe–H(2) 1.52. Fe–P(1) 2.190, Fe–P(2) 2.185, Fe–P(3) 2.188. Selected angles (in degrees): H(1)–Fe–H(2) 84.5, C(42)–Fe–H(1) 81.3, C(42)–Fe–H(2) 81.3, Fe–C(42)–O(1) 173.9, P(3)–Fe–H(1) 175.1, P(2)–Fe–H(2) 172.1, P(1)–Fe–C(42) 161.2.

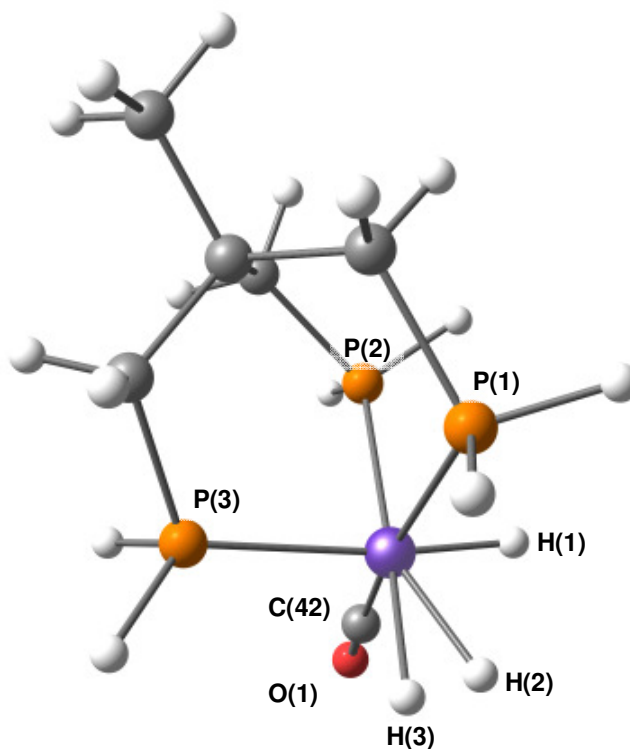

**Figure S2.** DFT structure of  $[(\text{triphos}')\text{Fe}(\text{CO})(\eta^2\text{-H}_2)\text{H}]^+$  (**2'**) calculated at the B3LYP level of theory with a 6-31G(d,p) basis set. Selected bond lengths (in Å): Fe–H(1) 1.51, Fe–H(2) 1.59, Fe–H(3) 1.62, H(1)–H(2) 1.74, H(2)–H(3) 0.85, Fe–P(1) 2.323, Fe–P(2) 2.235, Fe–P(3) 2.274. Selected angles (in degrees): H(1)–Fe–H(2) 68.6, H(1)–Fe–H(3) 99.2, H(2)–Fe–H(3) 30.6, C(42)–Fe–H(1) 84.9, C(42)–Fe–H(2) 89.0, C(42)–Fe–H(3) 90.6, Fe–C(42)–O(1) 176.2, P(3)–Fe–H(1) 173.4, P(2)–Fe–H(2) 152.8, P(2)–Fe–H(3) 174.8, P(1)–Fe–C(42) 169.6.

## Arrhenius and Eyring Plots for Processes A and B in the $^1\text{H}$ NMR Spectrum of Complex 1

**Data**

| T   | K(A) | K(B) | lnK(A) | lnK(B) | ln(K <sub>A</sub> /T) | ln(K <sub>B</sub> /T) | 1/T      |
|-----|------|------|--------|--------|-----------------------|-----------------------|----------|
| 280 | 400  | 2500 | 5.9915 | 7.824  | 0.35667               | 2.1893                | 0.003571 |
| 270 | 280  | 1200 | 5.6348 | 7.0901 | 0.036368              | 1.4917                | 0.003704 |
| 260 | 100  | 800  | 4.6052 | 6.6846 | -0.95551              | 1.1239                | 0.003846 |
| 240 | 40   | 400  | 3.6889 | 5.9915 | -1.7918               | 0.51083               | 0.004167 |

**for**

### Processes A and B

### Arrhenius plot of Bailar twist

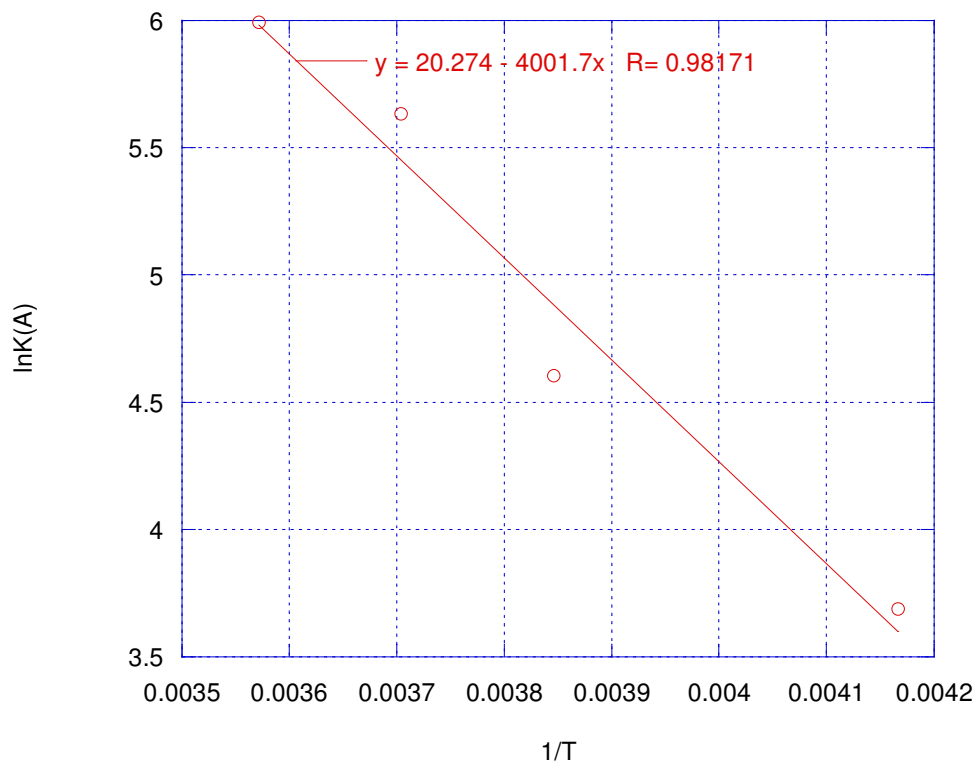

### Arrhenius plot of H exchange

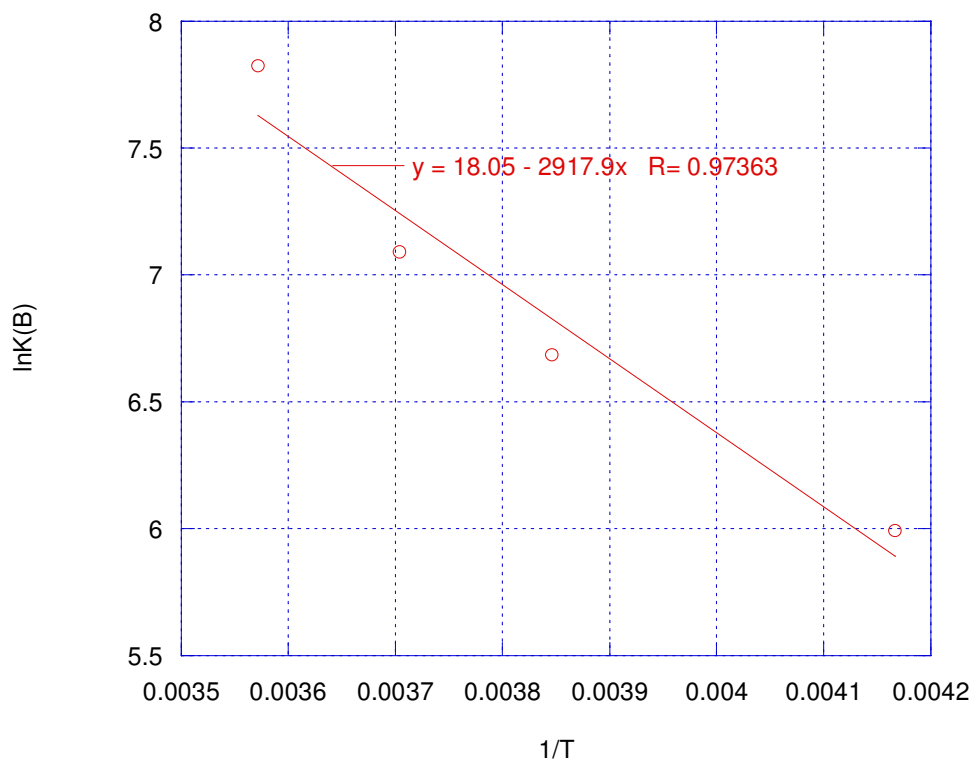

**Eyring plot of Bailar twist**

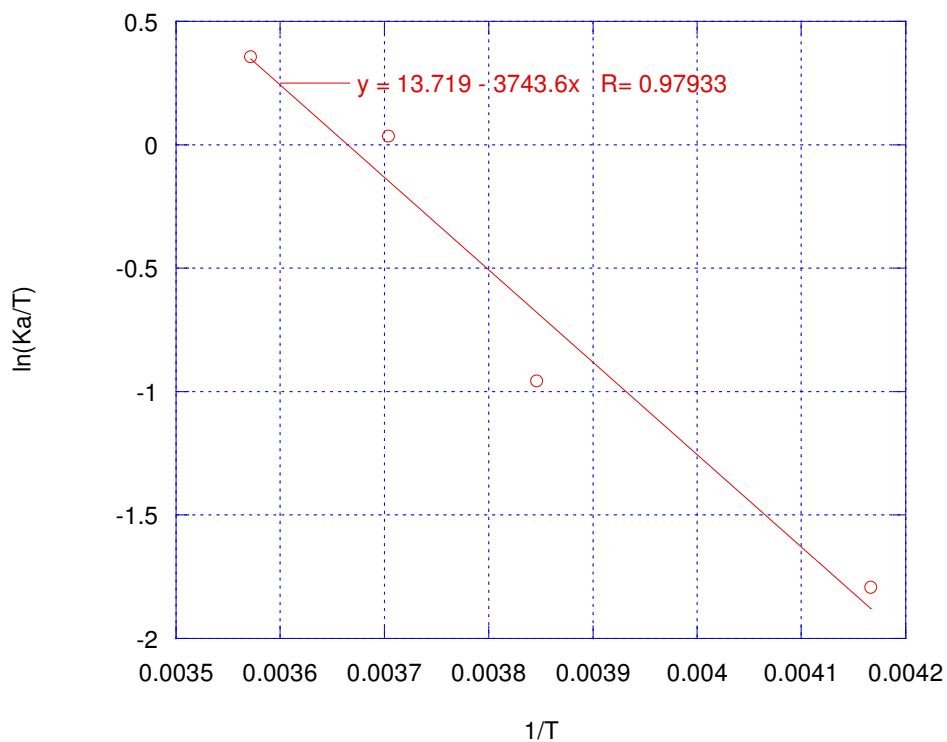

**Eyring plot of H exchange**

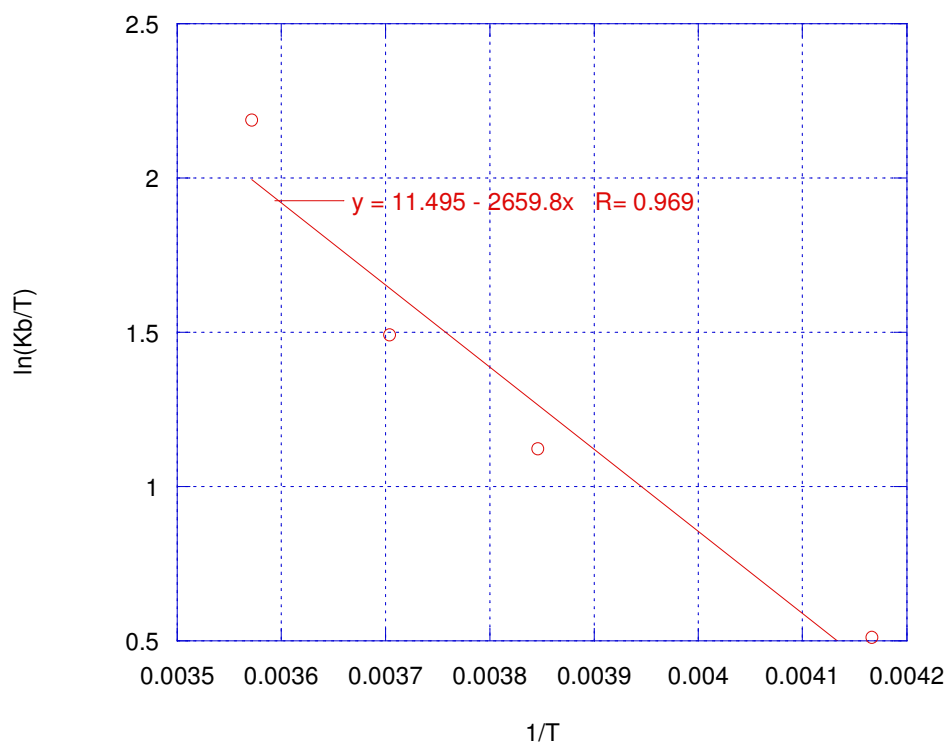

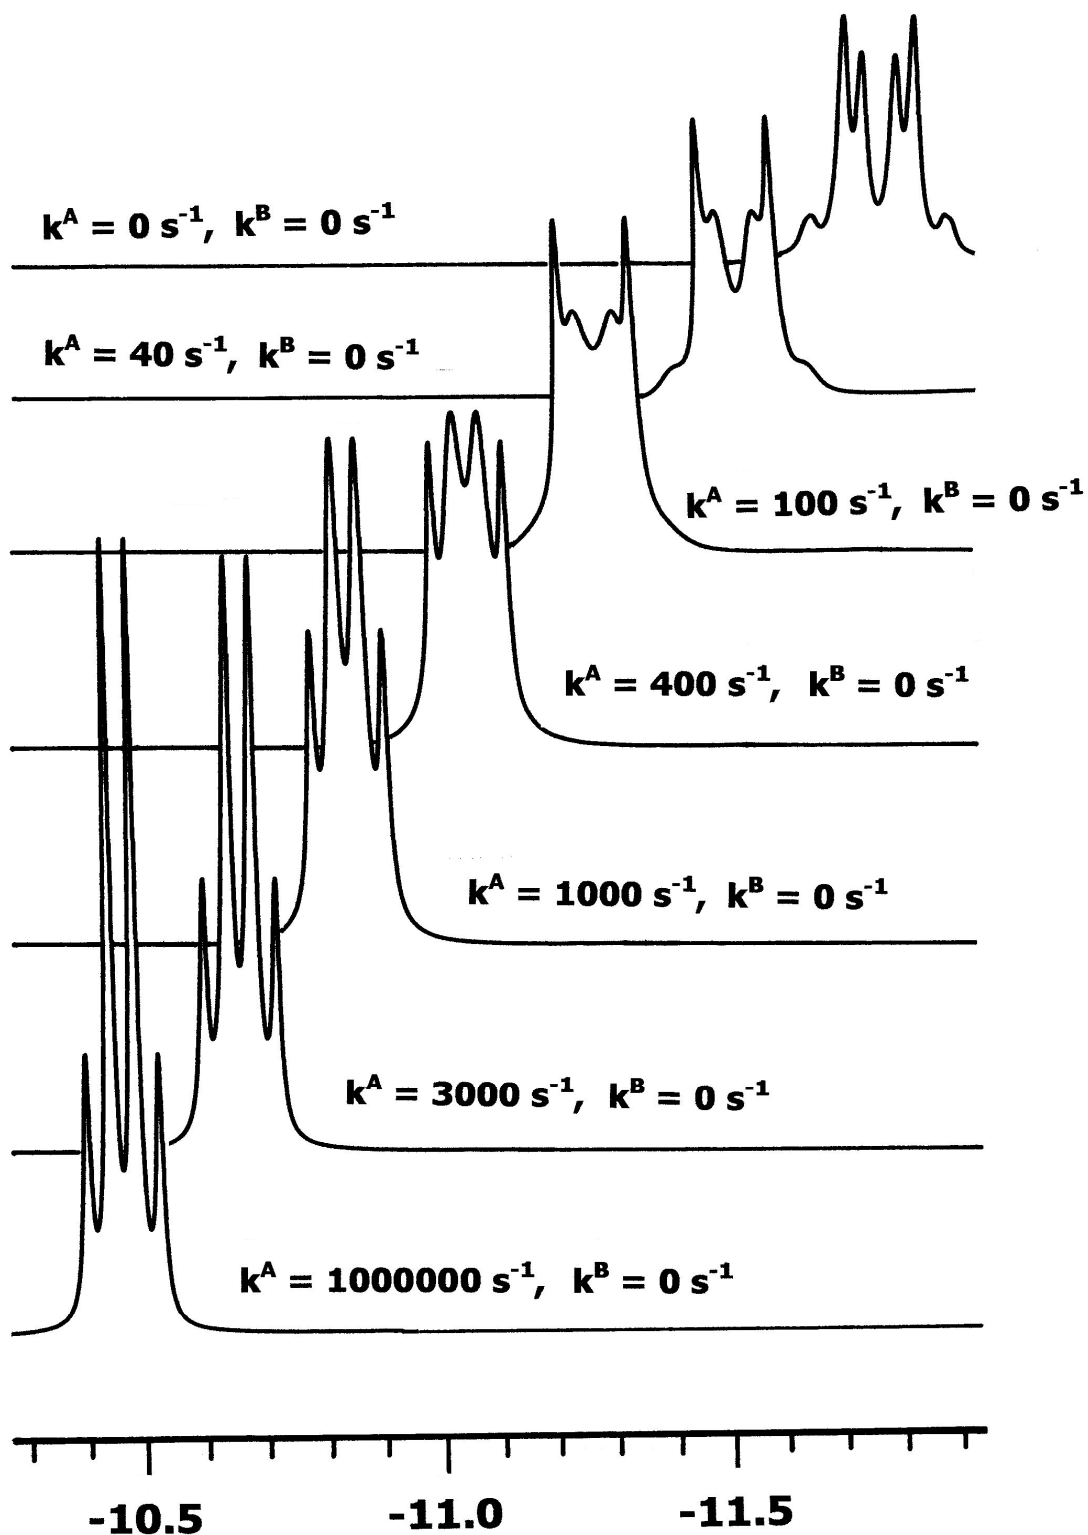

Simulated  $^1\text{H-NMR}$  spectra for 1 based on Bailar rotation mechanism A with rotation of the  $\text{Fe}(\text{CO})\text{H}_2$  group with respect to the triphos ligand (rate of process  $\text{A/s}^{-1} = k^A$ ).

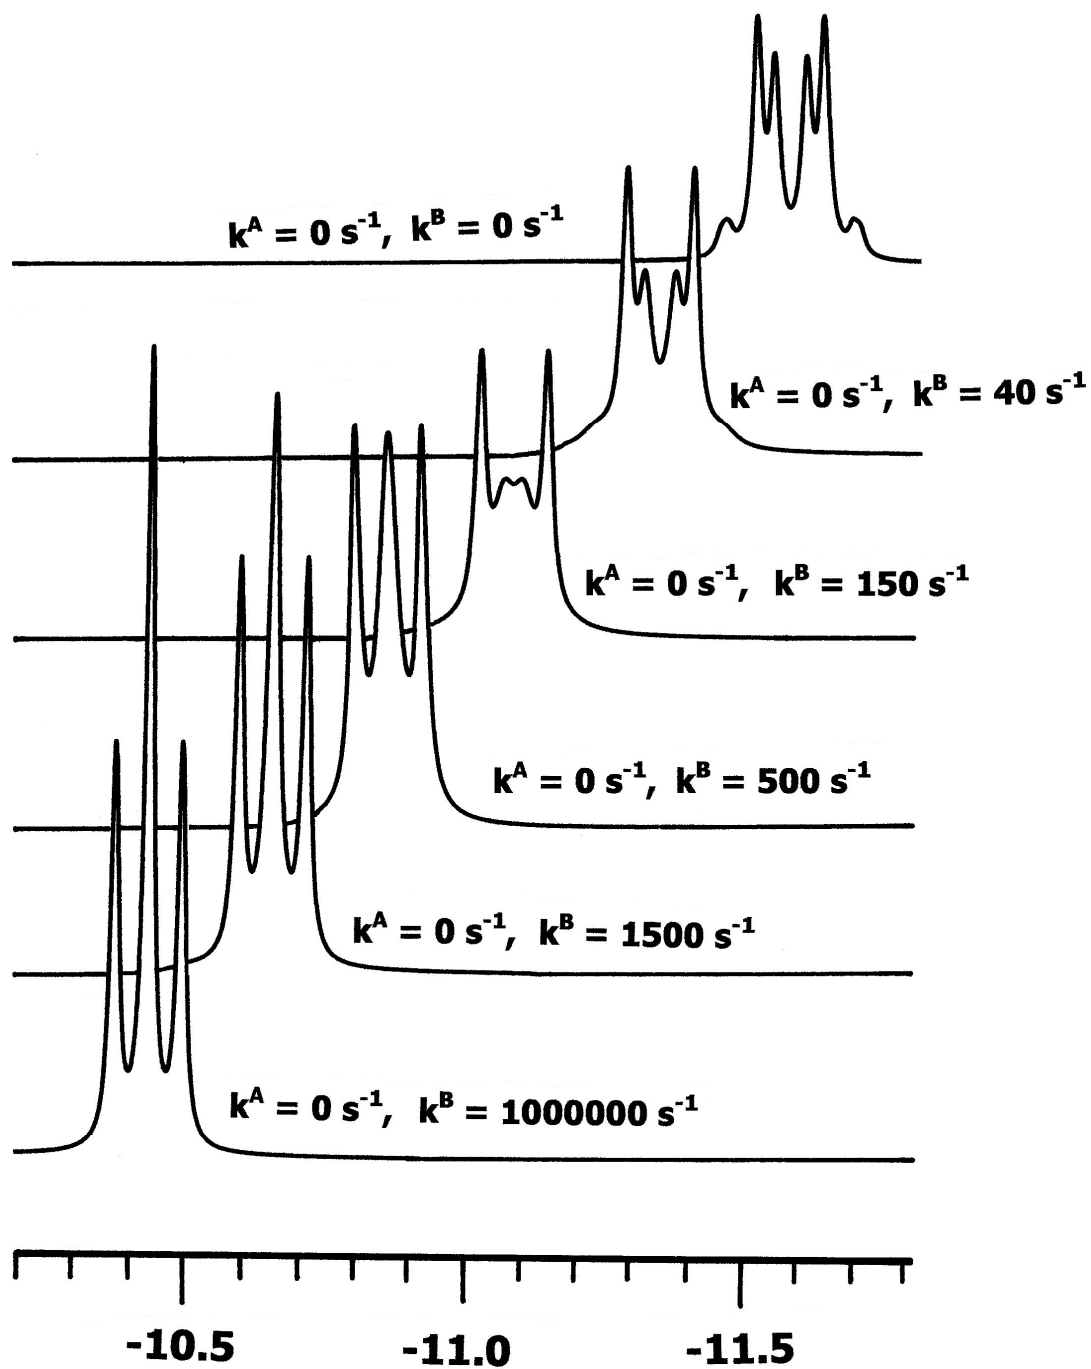

Simulated  $^1\text{H-NMR}$  spectra of 1 based on mechanism B with pairwise exchange of the two hydride ligands with the  $\text{Fe}(\text{triphos})(\text{CO})$  group remaining rigid (rate of process  $\text{B/s}^{-1} = k^B$ ).
